# Supplementary material for: Multiwalled Carbon Nanotube for One-Step Cleanup of 21 Mycotoxins in Corn and Wheat Prior to Ultraperformance Liquid Chromatography–Tandem Mass Spectrometry Analysis
Source: PubMed Central journal article supplement (PMC6215200; doi:10.3390/toxins10100409), 2018-10-10
Supplement: toxins-10-00409-s001.pdf [file toxins-10-00409-s001.pdf]

# Supplementary Materials: Multiwalled Carbon Nanotube for One-Step Cleanup of 21 Mycotoxins in Corn and Wheat Prior to Ultraperformance Liquid Chromatography–Tandem Mass Spectrometry Analysis

Dongmei Jiang, Dizhe Wei, Liuqing Wang, Shuai Ma, Yuanfang Du and Meng Wang

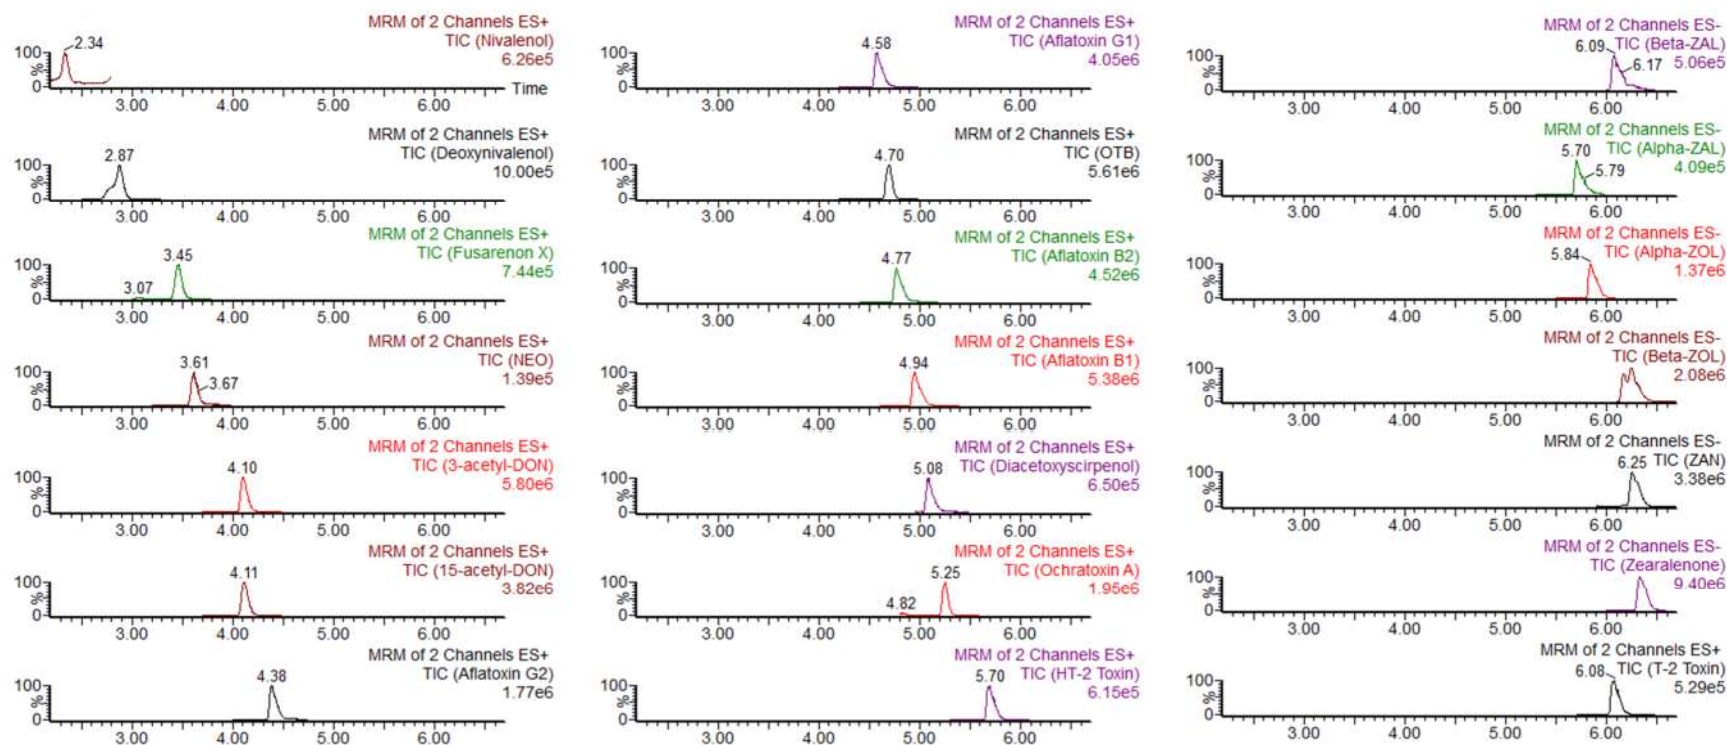

Figure S1. UPLC–MS/MS chromatograms of 21 targeted mycotoxins in a spiked (10 times LOQ) solvent sample.

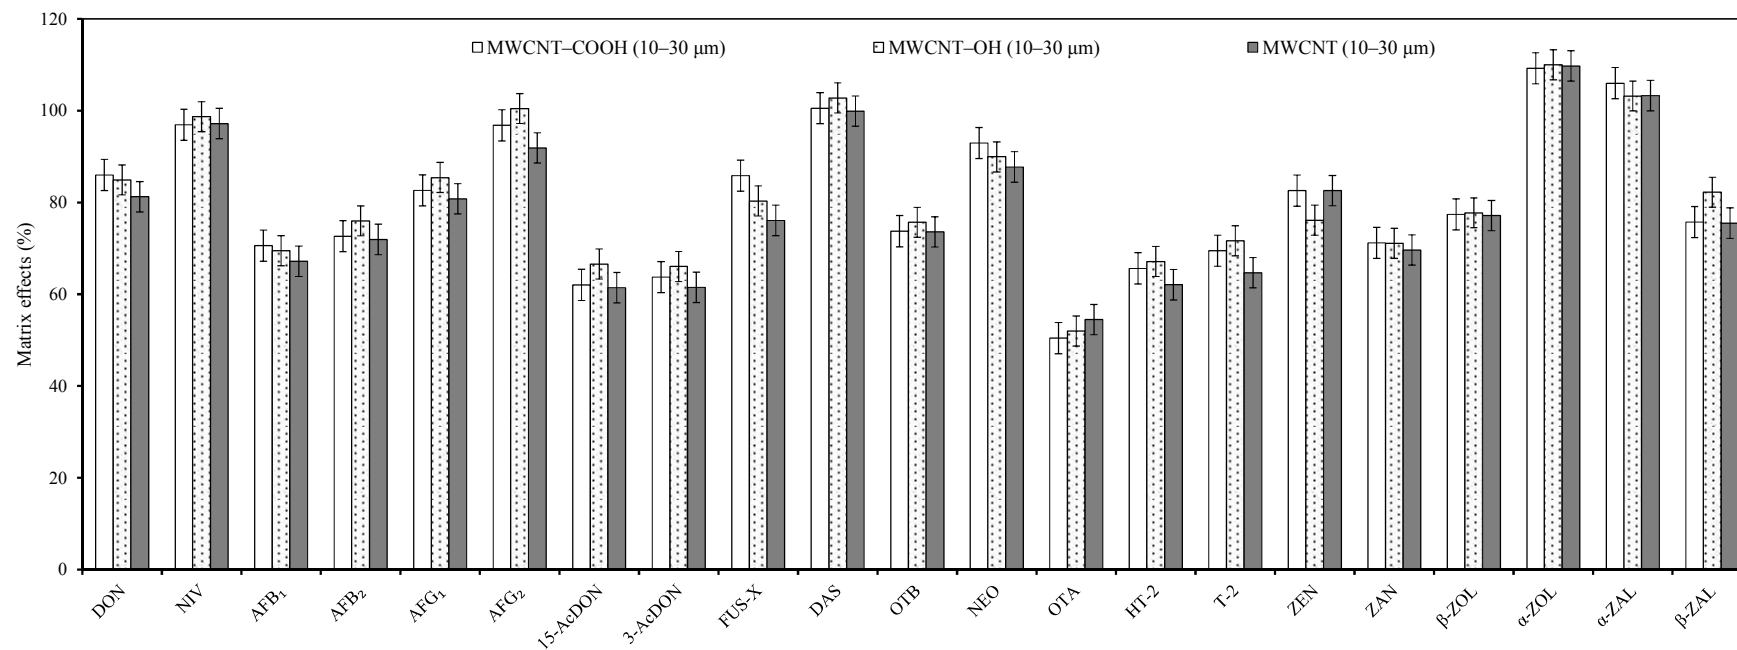

**Figure S2.** Effects of three MWCNT sorbents on matrix effect (%) of mycotoxins in corn. Vertical bar represents  $\pm$  standard error ( $n = 3$ ).

**Table S1.** Optimized multiple reactions monitoring (MRM) parameters for the 21 targeted mycotoxins.

| Mycotoxins       | Ionization Mode  | Precursor Ions (m/z) | Quantitative Ions (m/z) | Collision Energy (eV) | Qualitative Ions (m/z) | Collision Energy (eV) | Cone Voltage (eV) |
|------------------|------------------|----------------------|-------------------------|-----------------------|------------------------|-----------------------|-------------------|
| OTA              | ESI <sup>+</sup> | 404.2                | 239.1                   | 19                    | 358.1                  | 14                    | 30                |
| OTB              | ESI <sup>+</sup> | 370.2                | 205.2                   | 22                    | 187.1                  | 36                    | 32                |
| DON              | ESI <sup>+</sup> | 297.1                | 249.2                   | 10                    | 102.0                  | 15                    | 28                |
| NIV              | ESI <sup>+</sup> | 313.2                | 175.1                   | 20                    | 295.1                  | 8                     | 30                |
| NEO              | ESI <sup>+</sup> | 383.1                | 245.0                   | 10                    | 305.1                  | 10                    | 55                |
| FUS-X            | ESI <sup>+</sup> | 355.2                | 247.1                   | 15                    | 229.1                  | 10                    | 28                |
| 3-AcDON          | ESI <sup>+</sup> | 339.2                | 231.1                   | 14                    | 203.0                  | 12                    | 28                |
| 15-AcDON         | ESI <sup>+</sup> | 339.2                | 261.1                   | 10                    | 137.0                  | 20                    | 30                |
| DAS              | ESI <sup>+</sup> | 367.2                | 307.2                   | 10                    | 289.1                  | 12                    | 20                |
| HT-2             | ESI <sup>+</sup> | 442.2                | 263.1                   | 20                    | 105.1                  | 37                    | 25                |
| T-2              | ESI <sup>+</sup> | 484.2                | 305.1                   | 8                     | 245.1                  | 9                     | 30                |
| AFB <sub>1</sub> | ESI <sup>+</sup> | 313.2                | 241.1                   | 36                    | 285.1                  | 25                    | 30                |
| AFB <sub>2</sub> | ESI <sup>+</sup> | 315.2                | 287.1                   | 26                    | 259.1                  | 30                    | 40                |
| AFG <sub>1</sub> | ESI <sup>+</sup> | 329.2                | 243.1                   | 25                    | 283.1                  | 25                    | 35                |
| AFG <sub>2</sub> | ESI <sup>+</sup> | 331.2                | 245.1                   | 30                    | 257.1                  | 30                    | 40                |
| ZEN              | ESI <sup>-</sup> | 317.2                | 175.4                   | 24                    | 131.1                  | 25                    | 30                |
| ZAN              | ESI <sup>-</sup> | 319.0                | 205.0                   | 24                    | 163.5                  | 26                    | 30                |
| α-ZOL            | ESI <sup>-</sup> | 319.2                | 130.0                   | 34                    | 161.0                  | 30                    | 30                |
| β-ZOL            | ESI <sup>-</sup> | 319.2                | 130.0                   | 34                    | 161.0                  | 30                    | 30                |
| α-ZAL            | ESI <sup>-</sup> | 321.0                | 161.0                   | 28                    | 205.0                  | 24                    | 30                |
| β-ZAL            | ESI <sup>-</sup> | 321.0                | 161.0                   | 28                    | 205.0                  | 24                    | 30                |
